# Supplementary material
Source: publisher figshare collection journal article supplement (https://acs.figshare.com/ndownloader/files/4701949)
Supplement: Supplementary file 1 [file 4701949]

 
data_ros49 
 
_audit_creation_method            SHELXL-97 
_chemical_name_systematic 
; 
 ? 
; 
_chemical_name_common             ? 
_chemical_melting_point           ? 
_chemical_formula_moiety          'C12 H14 O4, C8 Cl2 N2 O2, C H2 Cl2' 
_chemical_formula_sum             'C21 H16 Cl4 N2 O6' 
_chemical_formula_weight          534.16 
 
loop_ 
 _atom_type_symbol 
 _atom_type_description 
 _atom_type_scat_dispersion_real 
 _atom_type_scat_dispersion_imag 
 _atom_type_scat_source 
 'C'  'C'   0.0033   0.0016 
 'International Tables Vol C Tables 4.2.6.8 and 6.1.1.4' 
 'H'  'H'   0.0000   0.0000 
 'International Tables Vol C Tables 4.2.6.8 and 6.1.1.4' 
 'N'  'N'   0.0061   0.0033 
 'International Tables Vol C Tables 4.2.6.8 and 6.1.1.4' 
 'O'  'O'   0.0106   0.0060 
 'International Tables Vol C Tables 4.2.6.8 and 6.1.1.4' 
 'Cl'  'Cl'   0.1484   0.1585 
 'International Tables Vol C Tables 4.2.6.8 and 6.1.1.4' 
 
_symmetry_cell_setting            'Triclinic' 
_symmetry_space_group_name_H-M    'P -1' 
_symmetry_space_group_name_Hall    '-P 1' 
 
loop_ 
 _symmetry_equiv_pos_as_xyz 
 'x, y, z' 
 '-x, -y, -z' 
 
_cell_length_a                    10.422(3) 
_cell_length_b                    10.711(3) 
_cell_length_c                    10.787(3) 
_cell_angle_alpha                 87.701(7) 
_cell_angle_beta                  74.392(6) 
_cell_angle_gamma                 89.976(7) 
_cell_volume                      1158.8(6) 
_cell_formula_units_Z             2 
_cell_measurement_temperature     173(2) 
_cell_measurement_reflns_used    1098
_cell_measurement_theta_min        2.41
_cell_measurement_theta_max       19.45

_exptl_crystal_description       'plates'
_exptl_crystal_colour            'dark'
_exptl_crystal_size_min          0.10
_exptl_crystal_size_mid          0.40
_exptl_crystal_size_max          0.50
_exptl_crystal_density_meas       ? 
_exptl_crystal_density_diffrn     1.531 
_exptl_crystal_density_method     'not measured' 
_exptl_crystal_F_000              544 
_exptl_absorpt_coefficient_mu     0.552 
_exptl_absorpt_correction_type    'multi-scan'
_exptl_absorpt_process_details    'Semi-empirical (SADABS procedure)'
_exptl_absorpt_correction_T_min   ?
_exptl_absorpt_correction_T_max   ?
 
_exptl_special_details 
; 
  Ratio of minimum to maximum apparent transmission:  0.842547 
; 
 
_diffrn_ambient_temperature       173(2) 
_diffrn_radiation_wavelength      0.71073 
_diffrn_radiation_type            MoK\a 
_diffrn_radiation_source          'fine-focus sealed tube' 
_diffrn_radiation_monochromator   graphite 
_diffrn_measurement_device        'Siemens SMART' 
_diffrn_measurement_method        
;
\w-scan, frame range 0.3 deg, hemisphere
; 
_diffrn_standards_number          none 
_diffrn_standards_interval_count  0 
_diffrn_standards_interval_time   0 
_diffrn_standards_decay_%         0 
_diffrn_reflns_number             14772 
_diffrn_reflns_av_R_equivalents   0.0985 
_diffrn_reflns_av_sigmaI/netI     0.1252 
_diffrn_reflns_limit_h_min        -13 
_diffrn_reflns_limit_h_max        13 
_diffrn_reflns_limit_k_min        -13 
_diffrn_reflns_limit_k_max        13 
_diffrn_reflns_limit_l_min        -14 
_diffrn_reflns_limit_l_max        13 
_diffrn_reflns_theta_min          1.90 
_diffrn_reflns_theta_max          27.50 
_reflns_number_total              5307 
_reflns_number_gt                 2899 
_reflns_threshold_expression      >2sigma(I) 
 
_computing_data_collection        'SMART V5.630 (BrukerAXS, 1997-2001)'
_computing_cell_refinement        'SAINT V6.28 (BrukerAXS, 1997-2001)'
_computing_data_reduction         'SAINT & SADABS V2.06 (Sheldrick, 2000)'
_computing_structure_solution     'SHELXTL v. 6.12 (Sheldrick, 2001)'
_computing_structure_refinement   'SHELXTL v. 6.12 (Sheldrick, 2001)'
_computing_molecular_graphics     'XP V5.06 (BrukerAXS, 1997-99)'
_computing_publication_material   'SHELXL-93, XCIF V5.05 (BrukerAXS, 1997-99)'
 
_refine_special_details 
; 
 Refinement of F^2^ against ALL reflections.  The weighted R-factor wR and 
 goodness of fit S are based on F^2^, conventional R-factors R are based 
 on F, with F set to zero for negative F^2^. The threshold expression of 
 F^2^ > 2sigma(F^2^) is used only for calculating R-factors(gt) etc. and is 
 not relevant to the choice of reflections for refinement.  R-factors based 
 on F^2^ are statistically about twice as large as those based on F, and R- 
 factors based on ALL data will be even larger. 
; 
 
_refine_ls_structure_factor_coef  Fsqd  
_refine_ls_matrix_type            full 
_refine_ls_weighting_scheme       calc  
_refine_ls_weighting_details 
 'calc w=1/[\s^2^(Fo^2^)+(0.0410P)^2^+0.0000P] where P=(Fo^2^+2Fc^2^)/3' 
_atom_sites_solution_primary      direct 
_atom_sites_solution_secondary    difmap 
_atom_sites_solution_hydrogens    geom 
_refine_ls_hydrogen_treatment     constr 
_refine_ls_extinction_method      none 
_refine_ls_extinction_coef        ? 
_refine_ls_number_reflns          5307 
_refine_ls_number_parameters      302 
_refine_ls_number_restraints      0 
_refine_ls_R_factor_all           0.1646 
_refine_ls_R_factor_gt            0.0856 
_refine_ls_wR_factor_ref          0.1499 
_refine_ls_wR_factor_gt           0.1347 
_refine_ls_goodness_of_fit_ref    1.184 
_refine_ls_restrained_S_all       1.184 
_refine_ls_shift/su_max           0.000 
_refine_ls_shift/su_mean          0.000 
 
loop_ 
 _atom_site_label 
 _atom_site_type_symbol 
 _atom_site_fract_x 
 _atom_site_fract_y 
 _atom_site_fract_z 
 _atom_site_U_iso_or_equiv 
 _atom_site_adp_type 
 _atom_site_occupancy 
 _atom_site_symmetry_multiplicity 
 _atom_site_calc_flag 
 _atom_site_refinement_flags 
 _atom_site_disorder_assembly 
 _atom_site_disorder_group 
C1 C 0.6918(5) 0.7772(5) 0.4856(4) 0.0356(12) Uani 1 1 d . . . 
C2 C 0.6480(4) 0.6837(4) 0.6839(4) 0.0211(10) Uani 1 1 d . . . 
C3 C 0.5956(4) 0.6019(4) 0.7874(4) 0.0230(10) Uani 1 1 d . . . 
H3 H 0.5064 0.5715 0.8088 0.028 Uiso 1 1 calc R . . 
C4 C 0.6849(4) 0.5686(4) 0.8569(4) 0.0194(9) Uani 1 1 d . . . 
C5 C 0.7948(4) 0.4537(4) 0.9742(5) 0.0354(12) Uani 1 1 d . . . 
C6 C 0.8170(4) 0.6094(4) 0.8211(4) 0.0214(10) Uani 1 1 d . . . 
C7 C 0.8722(4) 0.6869(3) 0.7137(4) 0.0194(9) Uani 1 1 d . . . 
H7 H 0.9634 0.7117 0.6882 0.023 Uiso 1 1 calc R . . 
C8 C 0.7812(4) 0.7242(3) 0.6479(4) 0.0185(9) Uani 1 1 d . . . 
C9 C 0.7278(5) 0.6798(5) 0.3855(4) 0.0501(15) Uani 1 1 d . . . 
H9A H 0.7526 0.6025 0.4245 0.075 Uiso 1 1 calc R . . 
H9B H 0.8031 0.7101 0.3149 0.075 Uiso 1 1 calc R . . 
H9C H 0.6512 0.6635 0.3519 0.075 Uiso 1 1 calc R . . 
C10 C 0.6480(5) 0.9003(5) 0.4396(5) 0.0527(15) Uani 1 1 d . . . 
H10A H 0.5685 0.8873 0.4095 0.079 Uiso 1 1 calc R . . 
H10B H 0.7197 0.9361 0.3686 0.079 Uiso 1 1 calc R . . 
H10C H 0.6273 0.9577 0.5106 0.079 Uiso 1 1 calc R . . 
C11 C 0.8393(5) 0.3316(4) 0.9135(6) 0.0576(17) Uani 1 1 d . . . 
H11A H 0.7785 0.2646 0.9587 0.086 Uiso 1 1 calc R . . 
H11B H 0.9297 0.3136 0.9193 0.086 Uiso 1 1 calc R . . 
H11C H 0.8386 0.3370 0.8227 0.086 Uiso 1 1 calc R . . 
C12 C 0.7913(5) 0.4595(5) 1.1141(5) 0.0500(15) Uani 1 1 d . . . 
H12A H 0.7532 0.5392 1.1470 0.075 Uiso 1 1 calc R . . 
H12B H 0.8820 0.4526 1.1234 0.075 Uiso 1 1 calc R . . 
H12C H 0.7363 0.3904 1.1631 0.075 Uiso 1 1 calc R . . 
C21 C 0.0953(4) 0.0874(4) 0.1278(4) 0.0246(10) Uani 1 1 d . . . 
C22 C 0.1394(4) 0.0191(4) 0.2168(4) 0.0276(11) Uani 1 1 d . . . 
C23 C 0.2800(4) 0.0234(4) 0.2190(4) 0.0262(10) Uani 1 1 d . . . 
C24 C 0.3680(4) 0.1090(4) 0.1247(4) 0.0212(10) Uani 1 1 d . . . 
C25 C 0.3252(4) 0.1736(4) 0.0318(4) 0.0253(10) Uani 1 1 d . . . 
C26 C 0.1866(4) 0.1658(4) 0.0259(4) 0.0266(10) Uani 1 1 d . . . 
C27 C 0.5070(5) 0.1095(4) 0.1248(4) 0.0293(11) Uani 1 1 d . . . 
C28 C 0.4164(5) 0.2414(4) -0.0741(4) 0.0299(11) Uani 1 1 d . . . 
C31 C 0.2794(6) 0.6888(5) 0.4482(6) 0.087(2) Uani 1 1 d . . . 
H31A H 0.3586 0.6346 0.4343 0.104 Uiso 1 1 calc R . . 
H31B H 0.2970 0.7538 0.3776 0.104 Uiso 1 1 calc R . . 
Cl1 Cl -0.06918(11) 0.09065(11) 0.13097(11) 0.0366(3) Uani 1 1 d . . . 
Cl2 Cl 0.03548(12) -0.07133(11) 0.33586(11) 0.0380(3) Uani 1 1 d . . . 
Cl3 Cl 0.13921(17) 0.59771(13) 0.44267(14) 0.0745(5) Uani 1 1 d . . . 
Cl4 Cl 0.25559(17) 0.75978(19) 0.59377(16) 0.0868(6) Uani 1 1 d . . . 
N1 N 0.6174(4) 0.1064(4) 0.1218(4) 0.0447(11) Uani 1 1 d . . . 
N2 N 0.4873(4) 0.2945(4) -0.1603(4) 0.0418(11) Uani 1 1 d . . . 
O1 O 0.5864(3) 0.7279(3) 0.5951(3) 0.0345(8) Uani 1 1 d . . . 
O2 O 0.8054(3) 0.7971(3) 0.5377(2) 0.0287(7) Uani 1 1 d . . . 
O3 O 0.6642(3) 0.4858(3) 0.9585(3) 0.0290(7) Uani 1 1 d . . . 
O4 O 0.8832(3) 0.5546(3) 0.9012(3) 0.0335(8) Uani 1 1 d . . . 
O5 O 0.3220(3) -0.0398(3) 0.2960(3) 0.0384(8) Uani 1 1 d . . . 
O6 O 0.1498(3) 0.2197(3) -0.0600(3) 0.0411(9) Uani 1 1 d . . . 
 
loop_ 
 _atom_site_aniso_label 
 _atom_site_aniso_U_11 
 _atom_site_aniso_U_22 
 _atom_site_aniso_U_33 
 _atom_site_aniso_U_23 
 _atom_site_aniso_U_13 
 _atom_site_aniso_U_12 
C1 0.035(3) 0.052(3) 0.021(2) 0.007(2) -0.010(2) -0.012(2) 
C2 0.026(3) 0.021(2) 0.017(2) -0.0041(18) -0.0054(19) -0.0024(19) 
C3 0.021(2) 0.026(2) 0.021(2) -0.0007(19) -0.0027(19) -0.0030(19) 
C4 0.020(2) 0.019(2) 0.017(2) 0.0050(17) -0.0022(18) 0.0001(18) 
C5 0.018(3) 0.042(3) 0.040(3) 0.020(2) -0.001(2) -0.005(2) 
C6 0.021(2) 0.023(2) 0.019(2) 0.0003(18) -0.0031(19) 0.0006(19) 
C7 0.016(2) 0.015(2) 0.023(2) -0.0035(18) 0.0008(18) -0.0016(18) 
C8 0.026(2) 0.017(2) 0.011(2) -0.0012(17) -0.0030(18) -0.0026(19) 
C9 0.059(4) 0.070(4) 0.021(3) -0.006(3) -0.009(2) -0.013(3) 
C10 0.050(3) 0.068(4) 0.042(3) 0.025(3) -0.020(3) -0.003(3) 
C11 0.036(3) 0.033(3) 0.091(5) 0.021(3) 0.001(3) 0.011(3) 
C12 0.031(3) 0.077(4) 0.042(3) 0.032(3) -0.015(2) -0.006(3) 
C21 0.026(3) 0.031(3) 0.015(2) -0.0027(19) -0.0019(19) -0.006(2) 
C22 0.030(3) 0.025(2) 0.023(2) -0.006(2) 0.002(2) -0.007(2) 
C23 0.035(3) 0.017(2) 0.024(2) -0.0013(19) -0.003(2) 0.000(2) 
C24 0.023(2) 0.016(2) 0.020(2) -0.0050(18) 0.0028(18) -0.0006(18) 
C25 0.029(3) 0.024(2) 0.021(2) -0.0079(19) -0.003(2) -0.003(2) 
C26 0.030(3) 0.031(3) 0.017(2) -0.005(2) -0.003(2) -0.005(2) 
C27 0.030(3) 0.022(3) 0.032(3) 0.000(2) -0.002(2) 0.001(2) 
C28 0.034(3) 0.034(3) 0.022(3) -0.012(2) -0.006(2) -0.005(2) 
C31 0.078(5) 0.033(3) 0.101(5) 0.009(3) 0.056(4) -0.002(3) 
Cl1 0.0277(7) 0.0524(8) 0.0297(7) 0.0014(6) -0.0082(5) -0.0115(6) 
Cl2 0.0381(7) 0.0371(7) 0.0328(7) 0.0083(5) -0.0005(5) -0.0113(6) 
Cl3 0.1029(13) 0.0402(8) 0.0592(10) -0.0165(7) 0.0166(9) -0.0080(8) 
Cl4 0.0724(12) 0.1312(16) 0.0576(11) 0.0252(10) -0.0232(9) -0.0369(11) 
N1 0.029(3) 0.047(3) 0.056(3) 0.005(2) -0.007(2) 0.004(2) 
N2 0.042(3) 0.054(3) 0.026(2) 0.002(2) -0.004(2) -0.015(2) 
O1 0.0325(18) 0.056(2) 0.0169(16) 0.0120(15) -0.0121(14) -0.0067(16) 
O2 0.0308(18) 0.0362(18) 0.0180(16) 0.0052(13) -0.0057(14) -0.0064(15) 
O3 0.0194(17) 0.0298(17) 0.0360(18) 0.0129(14) -0.0062(14) -0.0022(13) 
O4 0.0236(17) 0.0412(19) 0.0340(18) 0.0211(15) -0.0082(14) -0.0027(15) 
O5 0.044(2) 0.0258(18) 0.044(2) 0.0119(15) -0.0122(17) -0.0008(16) 
O6 0.042(2) 0.062(2) 0.0214(18) 0.0094(16) -0.0142(16) -0.0153(18) 
 
_geom_special_details 
; 
 All esds (except the esd in the dihedral angle between two l.s. planes) 
 are estimated using the full covariance matrix.  The cell esds are taken 
 into account individually in the estimation of esds in distances, angles 
 and torsion angles; correlations between esds in cell parameters are only 
 used when they are defined by crystal symmetry.  An approximate (isotropic) 
 treatment of cell esds is used for estimating esds involving l.s. planes. 
; 
 
loop_ 
 _geom_bond_atom_site_label_1 
 _geom_bond_atom_site_label_2 
 _geom_bond_distance 
 _geom_bond_site_symmetry_2 
 _geom_bond_publ_flag 
C1 O2 1.460(5) . ? 
C1 O1 1.460(5) . ? 
C1 C9 1.506(6) . ? 
C1 C10 1.504(7) . ? 
C2 O1 1.360(5) . ? 
C2 C3 1.380(5) . ? 
C2 C8 1.401(5) . ? 
C3 C4 1.382(5) . ? 
C3 H3 0.9500 . ? 
C4 O3 1.352(4) . ? 
C4 C6 1.391(5) . ? 
C5 O3 1.455(5) . ? 
C5 O4 1.477(5) . ? 
C5 C12 1.503(6) . ? 
C5 C11 1.503(7) . ? 
C6 O4 1.360(5) . ? 
C6 C7 1.388(5) . ? 
C7 C8 1.379(5) . ? 
C7 H7 0.9500 . ? 
C8 O2 1.360(4) . ? 
C9 H9A 0.9800 . ? 
C9 H9B 0.9800 . ? 
C9 H9C 0.9800 . ? 
C10 H10A 0.9800 . ? 
C10 H10B 0.9800 . ? 
C10 H10C 0.9800 . ? 
C11 H11A 0.9800 . ? 
C11 H11B 0.9800 . ? 
C11 H11C 0.9800 . ? 
C12 H12A 0.9800 . ? 
C12 H12B 0.9800 . ? 
C12 H12C 0.9800 . ? 
C21 C22 1.359(6) . ? 
C21 C26 1.477(5) . ? 
C21 Cl1 1.706(4) . ? 
C22 C23 1.473(6) . ? 
C22 Cl2 1.706(4) . ? 
C23 O5 1.220(5) . ? 
C23 C24 1.464(5) . ? 
C24 C25 1.366(6) . ? 
C24 C27 1.450(6) . ? 
C25 C28 1.444(6) . ? 
C25 C26 1.465(6) . ? 
C26 O6 1.220(5) . ? 
C27 N1 1.142(5) . ? 
C28 N2 1.151(5) . ? 
C31 Cl4 1.730(6) . ? 
C31 Cl3 1.773(6) . ? 
C31 H31A 0.9900 . ? 
C31 H31B 0.9900 . ? 
 
loop_ 
 _geom_angle_atom_site_label_1 
 _geom_angle_atom_site_label_2 
 _geom_angle_atom_site_label_3 
 _geom_angle 
 _geom_angle_site_symmetry_1 
 _geom_angle_site_symmetry_3 
 _geom_angle_publ_flag 
O2 C1 O1 104.7(3) . . ? 
O2 C1 C9 108.7(4) . . ? 
O1 C1 C9 109.2(4) . . ? 
O2 C1 C10 109.7(4) . . ? 
O1 C1 C10 108.8(4) . . ? 
C9 C1 C10 115.2(4) . . ? 
O1 C2 C3 127.0(4) . . ? 
O1 C2 C8 109.3(3) . . ? 
C3 C2 C8 123.5(4) . . ? 
C2 C3 C4 113.7(4) . . ? 
C2 C3 H3 123.1 . . ? 
C4 C3 H3 123.1 . . ? 
O3 C4 C3 127.0(4) . . ? 
O3 C4 C6 110.2(3) . . ? 
C3 C4 C6 122.5(4) . . ? 
O3 C5 O4 104.1(3) . . ? 
O3 C5 C12 109.1(4) . . ? 
O4 C5 C12 108.7(4) . . ? 
O3 C5 C11 110.1(4) . . ? 
O4 C5 C11 108.8(4) . . ? 
C12 C5 C11 115.5(4) . . ? 
O4 C6 C7 126.2(4) . . ? 
O4 C6 C4 109.5(3) . . ? 
C7 C6 C4 124.1(4) . . ? 
C8 C7 C6 113.1(4) . . ? 
C8 C7 H7 123.5 . . ? 
C6 C7 H7 123.5 . . ? 
O2 C8 C7 127.1(4) . . ? 
O2 C8 C2 109.9(3) . . ? 
C7 C8 C2 123.0(4) . . ? 
C1 C9 H9A 109.5 . . ? 
C1 C9 H9B 109.5 . . ? 
H9A C9 H9B 109.5 . . ? 
C1 C9 H9C 109.5 . . ? 
H9A C9 H9C 109.5 . . ? 
H9B C9 H9C 109.5 . . ? 
C1 C10 H10A 109.5 . . ? 
C1 C10 H10B 109.5 . . ? 
H10A C10 H10B 109.5 . . ? 
C1 C10 H10C 109.5 . . ? 
H10A C10 H10C 109.5 . . ? 
H10B C10 H10C 109.5 . . ? 
C5 C11 H11A 109.5 . . ? 
C5 C11 H11B 109.5 . . ? 
H11A C11 H11B 109.5 . . ? 
C5 C11 H11C 109.5 . . ? 
H11A C11 H11C 109.5 . . ? 
H11B C11 H11C 109.5 . . ? 
C5 C12 H12A 109.5 . . ? 
C5 C12 H12B 109.5 . . ? 
H12A C12 H12B 109.5 . . ? 
C5 C12 H12C 109.5 . . ? 
H12A C12 H12C 109.5 . . ? 
H12B C12 H12C 109.5 . . ? 
C22 C21 C26 121.8(4) . . ? 
C22 C21 Cl1 121.7(3) . . ? 
C26 C21 Cl1 116.5(3) . . ? 
C21 C22 C23 121.4(4) . . ? 
C21 C22 Cl2 122.5(3) . . ? 
C23 C22 Cl2 116.0(3) . . ? 
O5 C23 C24 121.1(4) . . ? 
O5 C23 C22 122.3(4) . . ? 
C24 C23 C22 116.6(4) . . ? 
C25 C24 C27 121.5(4) . . ? 
C25 C24 C23 121.9(4) . . ? 
C27 C24 C23 116.2(4) . . ? 
C24 C25 C28 121.9(4) . . ? 
C24 C25 C26 121.6(4) . . ? 
C28 C25 C26 116.1(4) . . ? 
O6 C26 C25 121.5(4) . . ? 
O6 C26 C21 122.1(4) . . ? 
C25 C26 C21 116.4(4) . . ? 
N1 C27 C24 177.5(5) . . ? 
N2 C28 C25 178.4(5) . . ? 
Cl4 C31 Cl3 112.0(3) . . ? 
Cl4 C31 H31A 109.2 . . ? 
Cl3 C31 H31A 109.2 . . ? 
Cl4 C31 H31B 109.2 . . ? 
Cl3 C31 H31B 109.2 . . ? 
H31A C31 H31B 107.9 . . ? 
C2 O1 C1 106.2(3) . . ? 
C8 O2 C1 105.7(3) . . ? 
C4 O3 C5 106.7(3) . . ? 
C6 O4 C5 106.0(3) . . ? 
 
_diffrn_measured_fraction_theta_max    0.998 
_diffrn_reflns_theta_full              27.50 
_diffrn_measured_fraction_theta_full   0.998 
_refine_diff_density_max    0.600 
_refine_diff_density_min   -0.759 
_refine_diff_density_rms    0.086 
